# Supplementary material
Source: bioRxiv or medRxiv preprint supplement (https://www.biorxiv.org/highwire/filestream/2256/field_highwire_adjunct_files/3/008862-12.pdf)
Supplement: Supplementary file [file 008862-12.pdf]

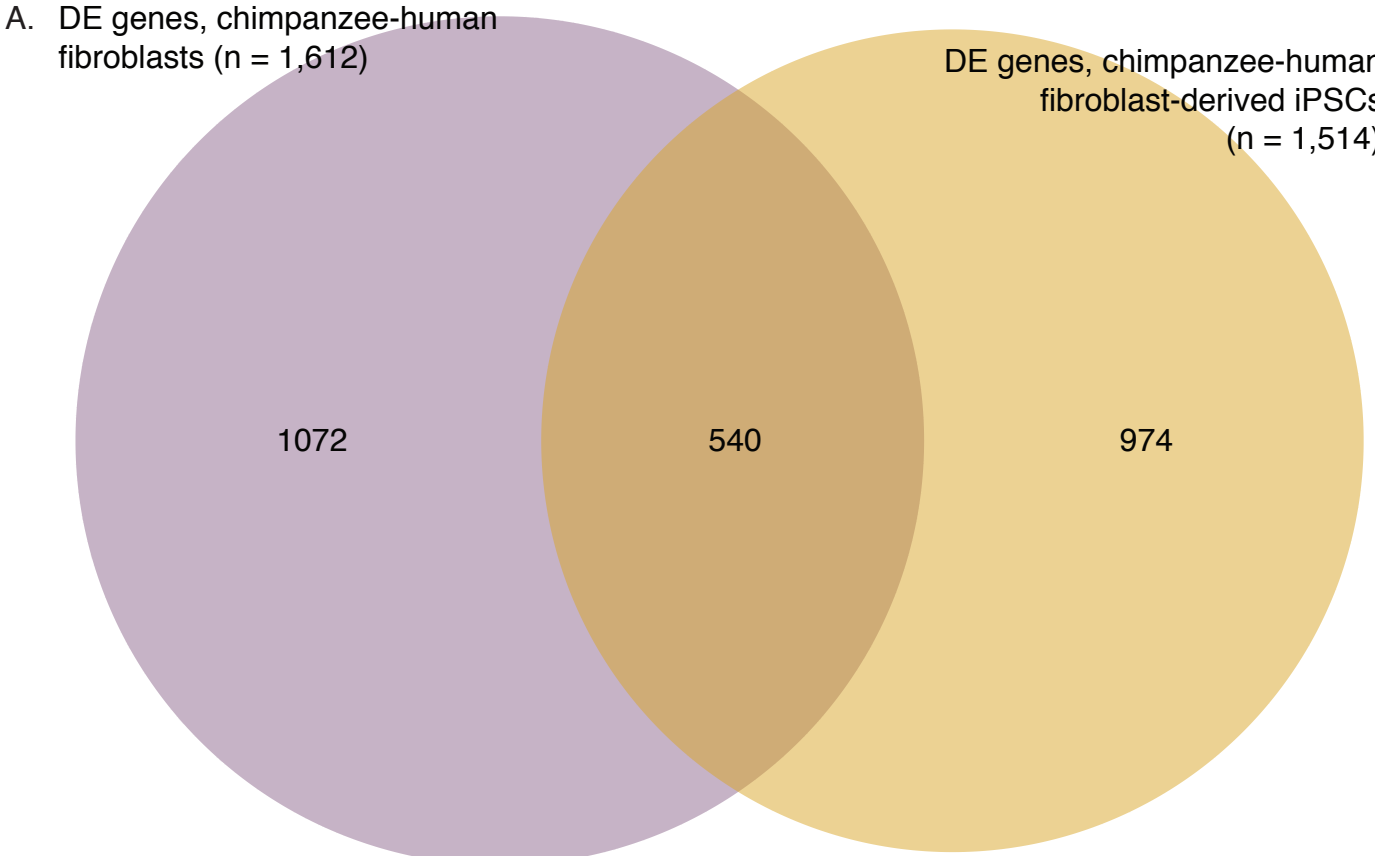

10,900 genes not DE in either

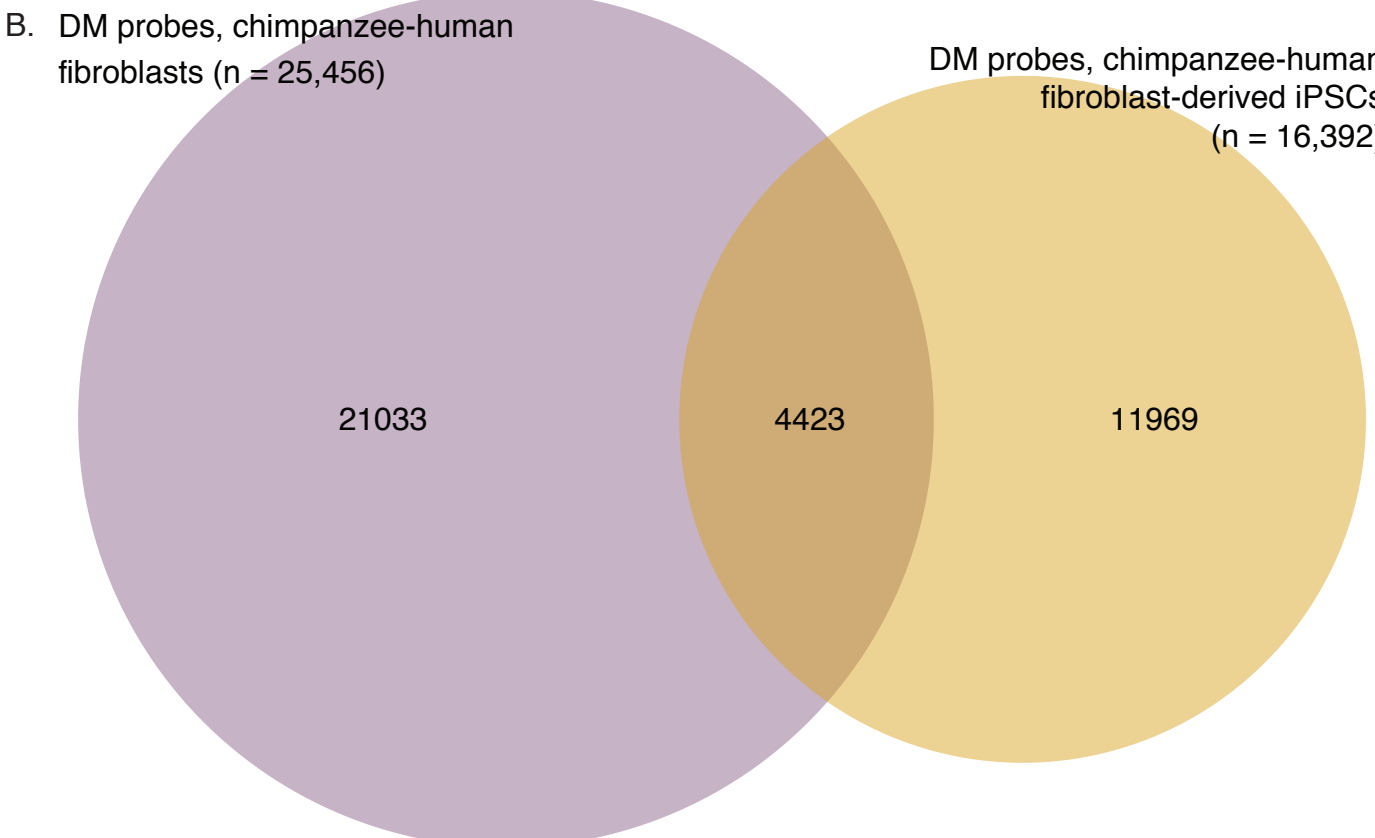

297,882 probes not DM in either
